# Supplementary material for: One-shot synthesis of star gradient copolymers with controllable graft density
Source: Royal Society of Chemistry journal article supplement (doi:10.1039/d1py00313e), 2021-01-01
Supplement: d1py00313e1.pdf [file d1py00313e1.pdf]

## Supporting Information

### **One-shot Synthesis of Star Gradient Copolymers with Controllable Graft Density**

Cuiping Hou,<sup>[a][b]</sup> Chulu Zhou<sup>[a][c]</sup> and Jianhua Cheng <sup>\*[a][c]</sup>

[a] State Key Laboratory of Polymer Physics and Chemistry

Changchun Institute of Applied Chemistry

Chinese Academy of Sciences

No. 5625, Renmin Street, Changchun 130022 (China)

E-Mail: jhcheng@ciac.ac.cn

[b] University of the Chinese Academy of Sciences

Changchun Branch, Changchun 130022 (China)

[c] University of Science and Technology of China

Hefei, Anhui 230029 (China)

## Contents

**Figure S1.**  $^1\text{H}$  NMR spectrum (500 MHz) of PS in  $\text{CDCl}_3$  (\*) at 25 °C.

**Figure S2.**  $^1\text{H}$  NMR spectrum (500 MHz) of PFP in  $\text{CDCl}_3$  (\*) at 25 °C.

**Figure S3.**  $^{19}\text{F}$   $\{^1\text{H}\}$  NMR spectrum (471 MHz) of PFP in  $\text{CDCl}_3$  at 25 °C.

**Figure S4.**  $^{13}\text{C}$   $\{^1\text{H}\}$  NMR spectrum (125 MHz) of PFP in  $\text{CDCl}_3$  at 25 °C.

**Figure S5.** Conformation plot of star gradient graft copolymers with different feed ratios.

**Figure S6.**  $^1\text{H}$  NMR spectra (500 MHz) of functionalized copolymers in  $\text{CDCl}_3$  (\*) at 25 °C.

**Figure S7.**  $^{19}\text{F}$  NMR spectra (471 MHz) of functionalized copolymers in  $\text{CDCl}_3$  at 25 °C.

**Figure S8.** FT-IR of functionalized copolymers.

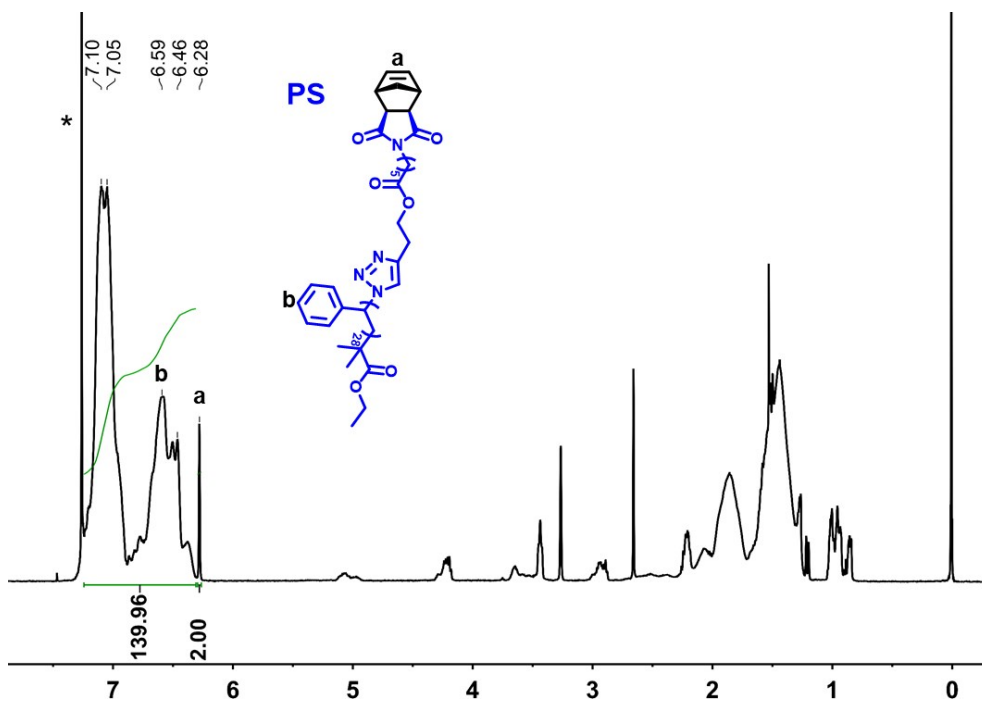

**Figure S1.** <sup>1</sup>H NMR spectrum (500 MHz) of PS in CDCl<sub>3</sub> (\*) at 25 °C.

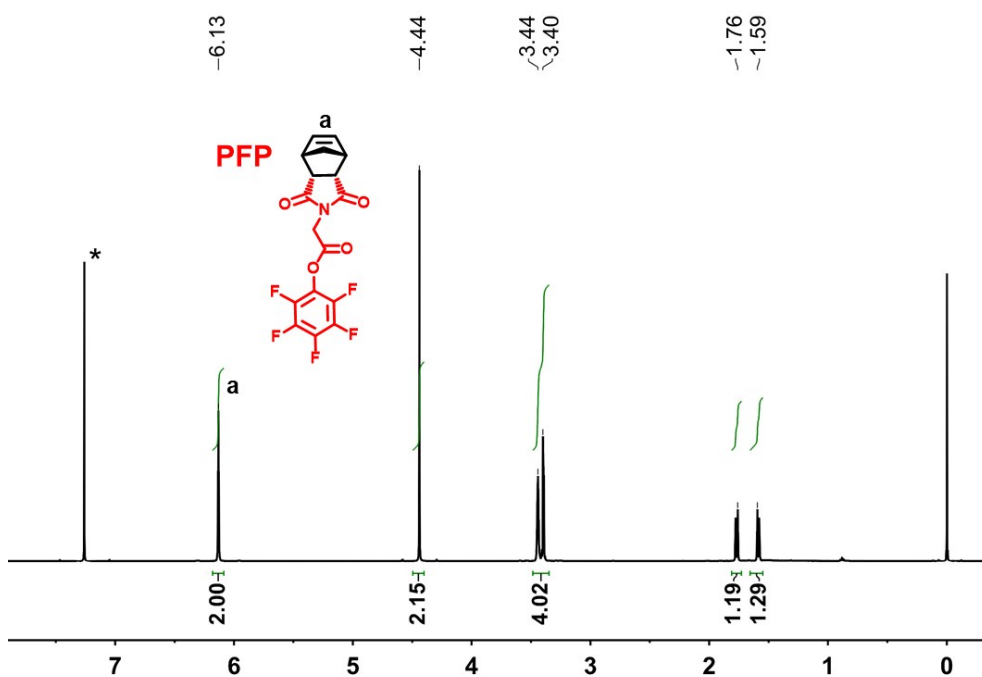

**Figure S2.** <sup>1</sup>H NMR spectrum (500 MHz) of PFP in CDCl<sub>3</sub> (\*) at 25 °C.

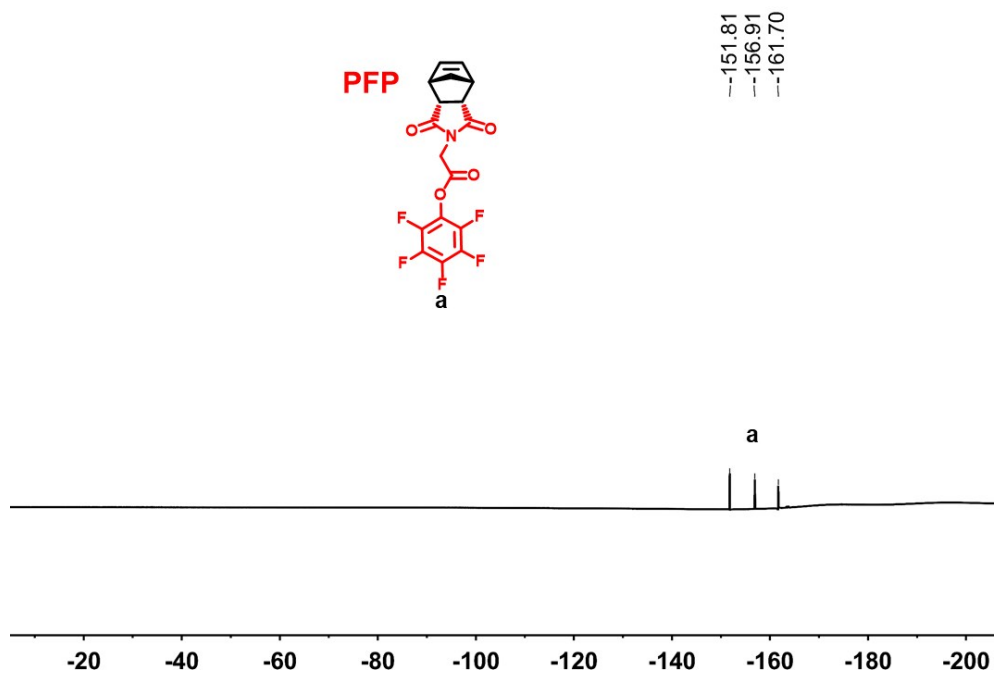

**Figure S3.**  $^{19}\text{F}$   $\{^1\text{H}\}$  NMR spectrum (471 MHz) of PFP in  $\text{CDCl}_3$  at 25 °C.

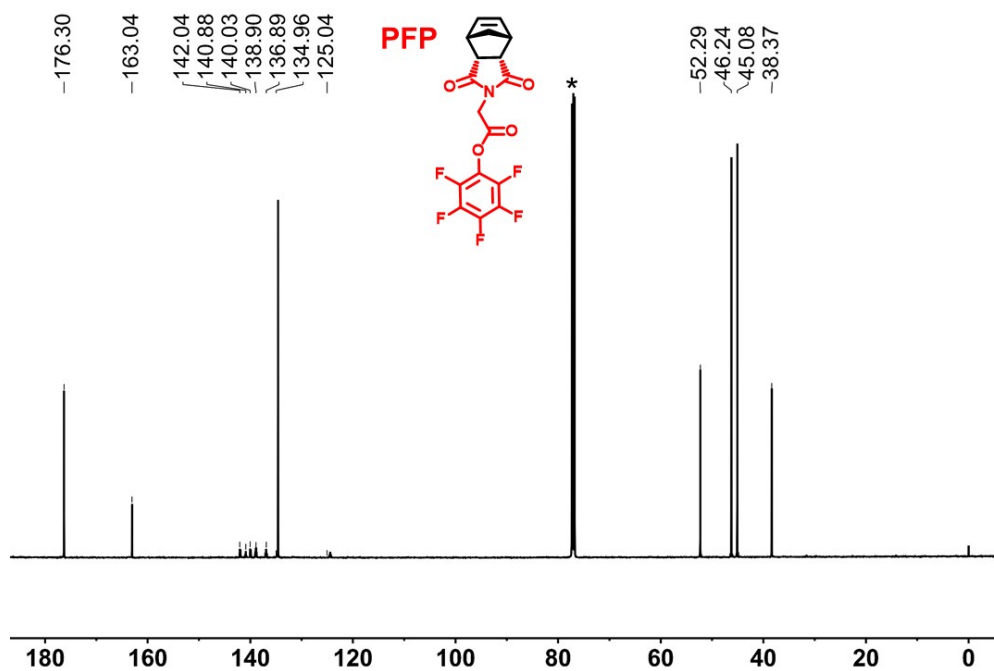

**Figure S4.**  $^{13}\text{C}$   $\{^1\text{H}\}$  NMR spectrum (125 MHz) of PFP in  $\text{CDCl}_3$  (\*) at 25 °C.

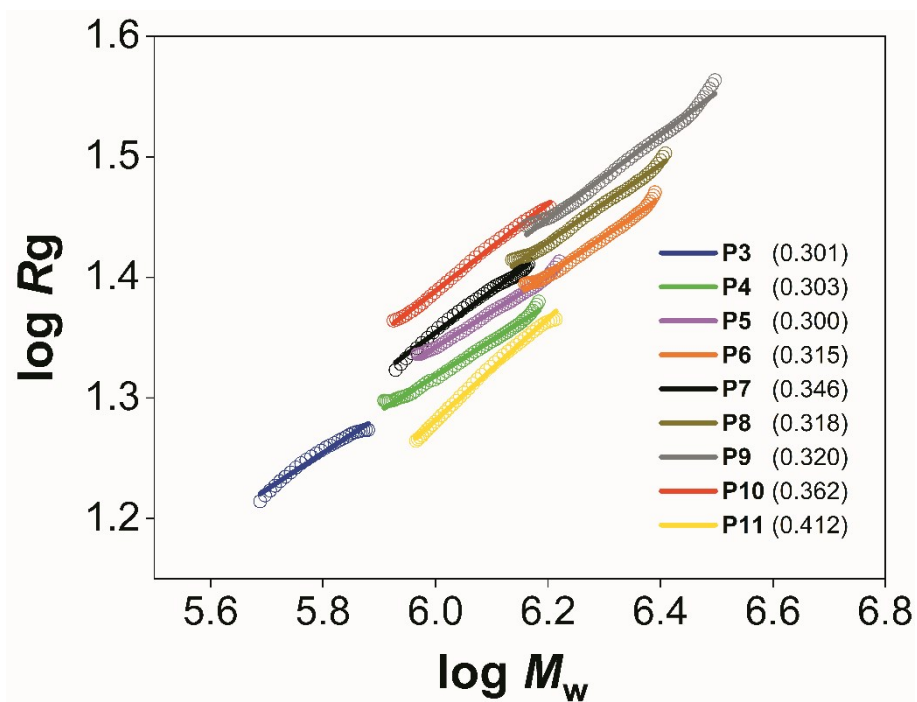

**Figure S5.** Conformation plot of star gradient graft copolymers with different feed ratios by SEC-MALLS analysis.

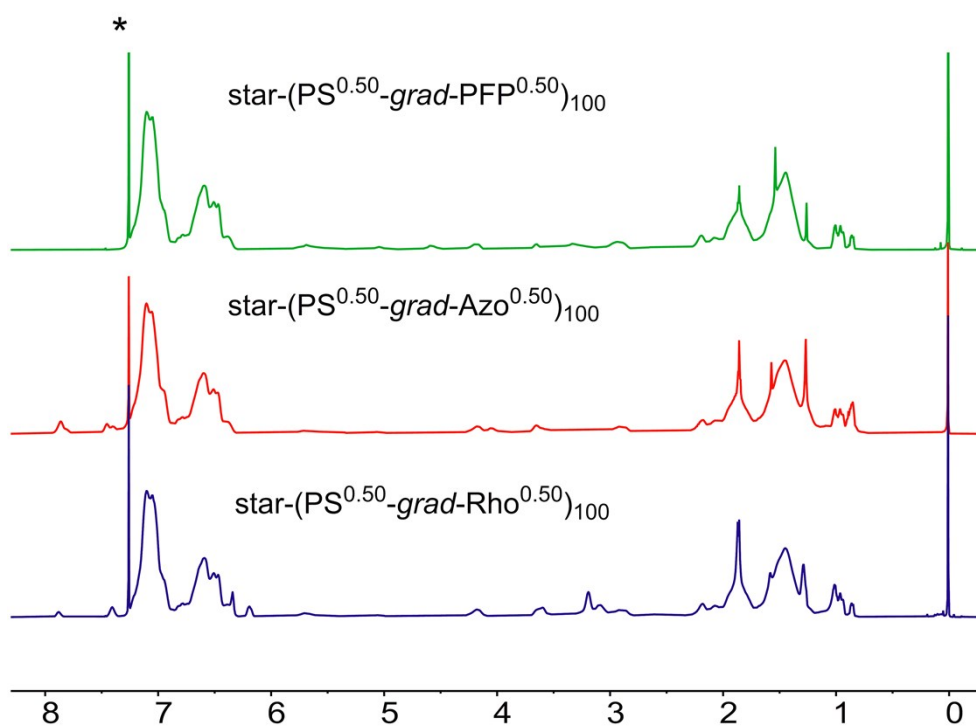

**Figure S6.**  $^1\text{H}$  NMR spectra (500 MHz) of functionalized copolymers in  $\text{CDCl}_3$  (\*) at 25 °C.

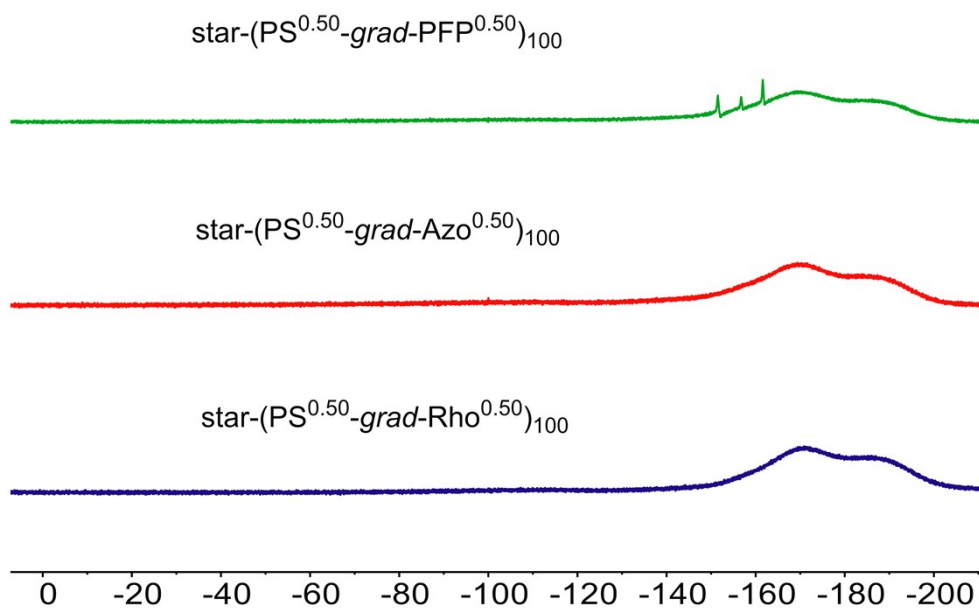

**Figure S7.** <sup>19</sup>F NMR spectra (471 MHz) of functionalized copolymers in CDCl<sub>3</sub> at 25 °C.

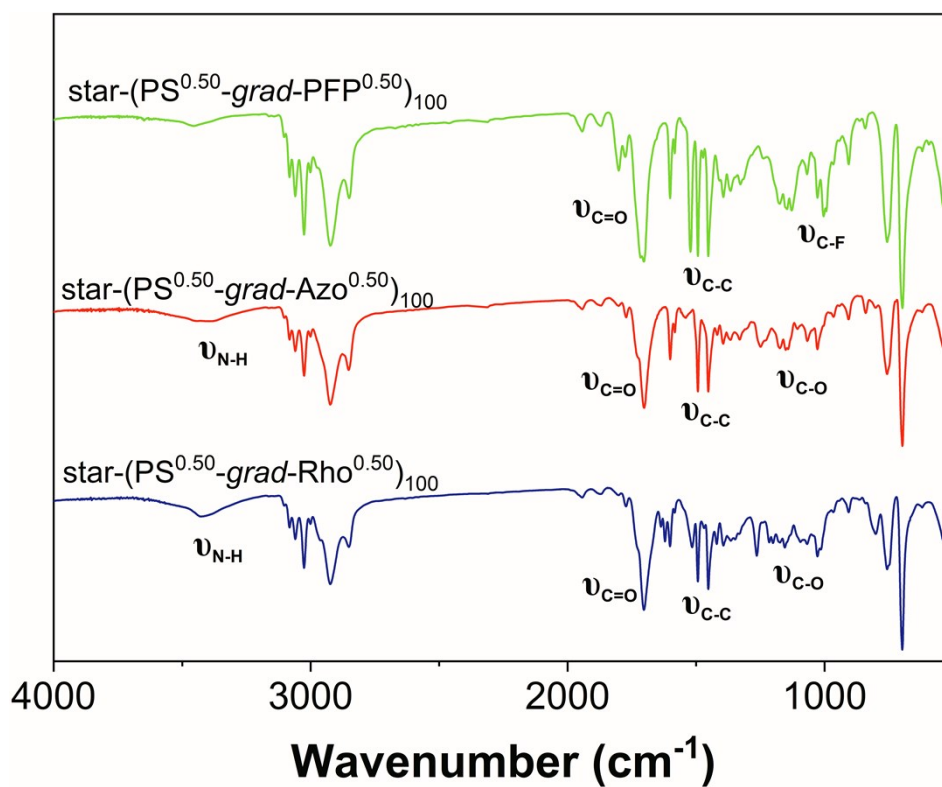

**Figure S8.** FT-IR of functionalized copolymers.
